# Supplementary material for: Inhibition of CPT2 exacerbates cardiac dysfunction and inflammation in experimental endotoxaemia
Source: PubMed Central journal article supplement (PMC7578905; doi:10.1111/jcmm.15809), 2020-09-07
Supplement: JCMM-24-11903-s001.pdf [file JCMM-24-11903-s001.pdf]

## **Inhibition of CPT2 exacerbates cardiac dysfunction and inflammation in experimental sepsis**

Marina Makrecka-Kuka<sup>1,\*</sup>, Stanislava Korzh<sup>1</sup>, Melita Videja<sup>1,2</sup>, Reinis Vilskersts<sup>1,2</sup>, Eduards Sevostjanovs<sup>1</sup>, Olga Zharkova-Malkova<sup>1</sup>, Pavel Arsenyan<sup>1</sup>, Janis Kuka<sup>1</sup>, Maija Dambrova<sup>1,2</sup>, Edgars Liepinsh<sup>1</sup>

<sup>1</sup> Latvian Institute of Organic Synthesis, Aizkraukles Str. 21, Riga, LV-1006, Latvia

<sup>2</sup> Riga Stradins University, Faculty of Pharmacy, Dzirciema Str 16, Riga, LV-1007, Latvia

\*Corresponding author: Marina Makrecka-Kuka, Ph.D.

Latvian Institute of Organic Synthesis,  
Aizkraukles Str. 21, Riga LV-1006, Latvia

Phone/fax: +371 66155159

E-mail address: [makrecka@farm.osi.lv](mailto:makrecka@farm.osi.lv)

### **Supporting Information**

#### **Methods**

##### **Synthesis of aminocarnitine**

Straightforward, totally stereo controlled synthesis of (*R*)-aminocarnitine was performed in 5 sequential steps from carnitine (Castagnani et al., 1995). Semi pure product was isolated as brownish foam. Taking in mind a necessity to utilize as pure as possible material in pharmacological studies this technical (*R*)-aminocarnitine was modified to Cbz-protected derivative, purified by reverse-phase chromatography on C18-silica gel to reed off all impurities. Then Cbz-protecting group was removed by bubbling of hydrogen gas in methanol solution of Cbz-(*R*)-aminocarnitine in the presence of palladium/charcoal (10%, wet). Finally, pure (*R*)-aminocarnitine was obtained as colourless foam after simple filtration, stirring of solution on Si-TMT (transition metal scavenger) and evaporation of a solvent.

Castagnani, R., et al., *Stereospecific synthesis of (R)-aminocarnitine (emeriamine) starting from (R)-carnitine via double inversion of configuration*. Journal of Organic Chemistry, **1995**. 60(25): 8318-8319.

**Gene accession number and primer sequences of qPCR primers**

| <b>Gene symbol</b> | <b>Full name</b>      | <b>NCBI Accession number</b>   | <b>Forward primer sequence (5'-&gt;3')</b> | <b>Reverse primer sequence (5'-&gt;3')</b> | <b>Amplicon length, b</b> |
|--------------------|-----------------------|--------------------------------|--------------------------------------------|--------------------------------------------|---------------------------|
| β-actin            | Beta actin            | <a href="#">NM_007393.5</a>    | CCTCTATGCCAACACAGTGC                       | CATCGTACTCCTGCTTGCTG                       | 215                       |
| TNFα               | Tumor necrosis factor | <a href="#">NM_013693.3</a>    | GACCCTCACACTCAGATCATCTTCT                  | CCTCCACTTGGTGGTTTGCT                       | 80                        |
| IL6                | Interleukin-6         | <a href="#">NM_001314054.1</a> | TCTATACCACTTCACAAGTCGGA                    | GAATTGCCATTGCACAACCTCTT                    | 88                        |
| Il1β               | Interleukin-1-beta    | <a href="#">NM_008361.4</a>    | GGGCCTCAAAGGAAAGAATC                       | TTGCTTGGGATCCCACTCT                        | 88                        |

Ye J, et al., *Primer-BLAST: a tool to design target-specific primers for polymerase chain reaction*. BMC Bioinformatics. **2012**;13(1):134.

doi:10.1186/1471-2105-13-134

## Results

**Supplementary Table S1. Echocardiographic heart parameters 4 h after LPS administration**

|                   | Control     | LPS 10 mg/kg |             |             |                        |
|-------------------|-------------|--------------|-------------|-------------|------------------------|
|                   | Saline      | Control      | C75         | A769662     | AminoCarnitine         |
| Heart rate, bpm   | 473±17      | 516±11*      | 517±20      | 504±21      | 420±13 <sup>#</sup>    |
| LVPWs, mm         | 1.40±0.09   | 1.08±0.07*   | 1.15±0.07   | 1.16±0.07   | 1.20±0.07              |
| LVPWd, mm         | 0.69±0.05   | 0.67±0.03    | 0.72±0.05   | 0.69±0.06   | 0.82±0.04 <sup>#</sup> |
| LVIDs, mm         | 2.51±0.03   | 2.49±0.12    | 2.52±0.05   | 2.59±0.13   | 2.44±0.15              |
| LVIDd, mm         | 4.38±0.06   | 3.85±0.07*   | 3.84±0.08   | 3.98±0.11   | 3.76±0.12              |
| IVSs, mm          | 1.37±0.10   | 1.31±0.06    | 1.30±0.03   | 1.29±0.03   | 1.33±0.05              |
| IVSd, mm          | 0.67±0.03   | 0.72±0.02    | 0.75±0.03   | 0.71±0.03   | 0.80±0.05              |
| ESV, ml           | 0.042±0.002 | 0.042±0.006  | 0.043±0.002 | 0.047±0.007 | 0.041±0.007            |
| EDV, ml           | 0.200±0.014 | 0.144±0.008* | 0.144±0.009 | 0.159±0.012 | 0.136±0.013            |
| Stroke volume, ml | 0.158±0.013 | 0.102±0.005* | 0.101±0.008 | 0.112±0.008 | 0.096±0.007            |

Left ventricular posterior wall thickness at end-systole (LVPWs) and at end-diastole (LVPWd), left ventricular internal dimension at end-systole (LVIDs) and at end-diastole (LVIDd), interventricular septal thickness at end-systole (IVSs) and at end-diastole (IVSd), left ventricular volume at end-systole (ESV) and at end-diastole (EDV), and stroke volume calculated as difference between EDV and ESV 4 h after LPS administration. Each value represents the mean ± SEM of 5-6 animals. \*Significant difference between saline control and LPS control groups (Student's t-test, P<0.05); <sup>#</sup>Significantly different from the LPS control group (ANOVA followed by Dunnett's test, P < 0.05).
